# Supplementary material for: A photostable fluorescent probe for rapid monitoring and tracking of a trans-membrane process and mitochondrial fission and fusion dynamics
Source: Royal Society of Chemistry journal article supplement (doi:10.1039/c5nj02821c), 2016-01-01
Supplement: c5nj02821c1.pdf [file c5nj02821c1.pdf]

*Supporting Information for*

**A photostable fluorescent probe for rapid monitoring and tracking trans membrane process and mitochondrial fission and fusion dynamics**

Yong Liu<sup>a</sup>, Fangfang Meng<sup>a</sup>, Yonghe Tang<sup>a</sup>, Xiaoqiang Yu<sup>b\*</sup>, Weiyong Lin<sup>a\*</sup>

a\* Institute of Fluorescent Probes for Biological Imaging, School of Chemistry and Chemical Engineering, School of Biological Science and Technology, University of Jinan, Jinan, Shandong 250022, P. R. China.

Tel: +86-531-82769031

Fax: +86-531-82769031

E-mail: weiyonglin2013@163.com

b\* Center of Bio & Micro/Nano Functional Materials, State Key Laboratory of Crystal Materials, Shandong University, Jinan, 250100, PR China.

Tel: +86-531-88366418

Fax: +86-531-883664263

## Table of contents

|                                   | Page   |
|-----------------------------------|--------|
| 1. Synthetic route.....           | S3-S4  |
| 2. Table S1.....                  | S5     |
| 3. Fig. S1.....                   | S6     |
| 4. Fig. S2.....                   | S7     |
| 5. Fig. S3.....                   | S8     |
| 6. VideoS1-S4.....                | S9     |
| 7. Spectral Characterization..... | S10-12 |
| 8. References.....                | S13    |

## 1. Synthetic route, experimental details and characterization of MT-PVIM.

*N*-(2-dodecane)-4-methylpyridinium iodide (**1**): 0.05 mol of 4-picoline and 0.055 mol 1-iodododecane were mixed and stirred for 4h, thereafter refluxed for 2 h. After cooling and filtrating, the final product were washed with ether. *N*-(2-dodecane)-4-methylpyridinium iodide: Light red powder, yield 90%. <sup>1</sup>H NMR (400 MHz, DMSO-*d*<sub>6</sub>), δ (ppm): 9.05 (d, *J* = 8.0 Hz, 2H), 8.05 (d, *J* = 8.0 Hz, 2H), 4.60 (t, *J* = 8.0 Hz, 2H), 2.64 (s, 3H), 1.92 (m, 2H), 1.28 (m, 6H), 0.86 (t, *J* = 6.0 Hz, 3H).

### *Synthesis of (E)-5-(2-(Pyridin-4-yl) vinyl)-1H-indole-3-carbaldehyde (3):*

5-Bromo-1*H*-indole-3-carbaldehyde **2** (5 mmol) was added to a high pressure tube with a mixture of palladium(II) acetate (15 mg), tri-*o*-tolylphosphine (150 mg) and then to which was added the solvent pair (triethylamine 14 mL /tetrahydrofuran 42 mL) and 4-vinylpyridine (2 mL). The tube was sealed after bubbling for 15 min with nitrogen. After keeping the system under ~ 108 °C for three days, the precipitate was collected and washed with water and dichloromethane. The title product was obtained as a yellow solid, yield 55%. <sup>1</sup>H NMR (300 MHz, DMSO-*d*<sub>6</sub>), δ (ppm): 12.21 (s, 1H), 9.97 (s, 1H), 8.53 (d, *J* = 6.0 Hz, 2H), 8.33 (d, *J* = 12.9 Hz, 2H), 7.70 (d, *J* = 16.5 Hz, 1H), 7.64 (dd, *J* = 8.4 Hz, 1.5 Hz, 1H), 7.60 (d, *J* = 6.0 Hz, 2H), 7.54 (d, *J* = 8.4 Hz, 1H), 7.19 (d, *J* = 16.2 Hz, 1H).

*Synthesis of MT-PVIM:* The condensation between **3** (1.45mmol) and *N*-(2-butyl/hexyl)-4-methylpyridinium iodide (1.57 mmol) happened in methanol with about four drops of piperidine. The mixture was stirred at 70 °C for 4 h and then a precipitate formed. This precipitate was filtered and washed with dichloromethane and little methanol as a red powder, which was then recrystallized from methanol twice. The compound **MT-PVIM**

was obtained in 60 % yield, respectively. Characterization data for **MT-PVIM**:  $^1\text{H}$  NMR (400 MHz, DMSO- $d_6$ ),  $\delta$  (ppm): 12.07 (s, 1H), 8.82(d, J = 6.8 Hz, 2H), 8.56 (d, J = 5.9 Hz, 2H), 8.41 (s, 1H), 8.29 (d, J = 16.2 Hz, 1H), 8.18 (d, J = 6.8 Hz, 2H), 8.00 (s, 1H), 7.73~7.54 (m, 5H), 7.35 (dd, J = 56.8, 16.3 Hz, 2H), 4.43 (t, J = 7.3 Hz, 2H), 1.92~1.90 (m, 2H), 1.26 (m, 18H), 0.84 (t, J = 6.7 Hz, 3H).  $^{13}\text{C}$  NMR (300 MHz, DMSO- $d_6$ ),  $\delta$  (ppm): 155.37, 150.98, 145.71, 144.38, 138.70, 137.06, 135.24, 133.77, 130.63, 126.34, 124.82, 122.97 (2C), 121.53, 120.90, 118.25, 114.99, 113.99, 60.07, 32.23, 31.40, 29.94 (2C), 29.83, 29.73, 29.64, 29.32, 26.39, 23.02, 14.88. HRMS (m/z):  $[\text{M-I}]^+$ . Calcd for  $\text{C}_{34}\text{H}_{42}\text{IN}_3$ : 492.34; found, 492.34.

**2. Table S1.** Probes of real-time image or track mitochondria

| Mitochondria probe                      | Structures of mitochondria probe                                                    | Time of enter cell and real-time image mitochondria | Can or can not track mitochondrial Fission and Fusion Dynamics | Reference                        |
|-----------------------------------------|-------------------------------------------------------------------------------------|-----------------------------------------------------|----------------------------------------------------------------|----------------------------------|
| MitoTracker Red (MTR)                   | 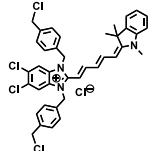   | 15 min                                              | No                                                             | Commercially mitochondrial probe |
| CMT-red                                 |    | 30 min                                              | No                                                             | Ref.1                            |
| NPA-TPP                                 |    | 30 min                                              | No                                                             | Ref.2                            |
| TPE-TPP                                 |   | 1.5 h                                               | No                                                             | Ref.3                            |
| JC-1                                    |  | 30min                                               | Yes                                                            | Ref.4                            |
| Rhodamine 123                           |  | 30min                                               | Yes                                                            | Ref.5                            |
| Green fluorescent proteins (GFP)        |  | Plasmid transfection                                | Yes                                                            | Ref.6                            |
| Some proteins : CFP-Bax (red), YFP-Drp1 | protein                                                                             | Plasmid transfection                                | Yes                                                            | Ref.7                            |

3.

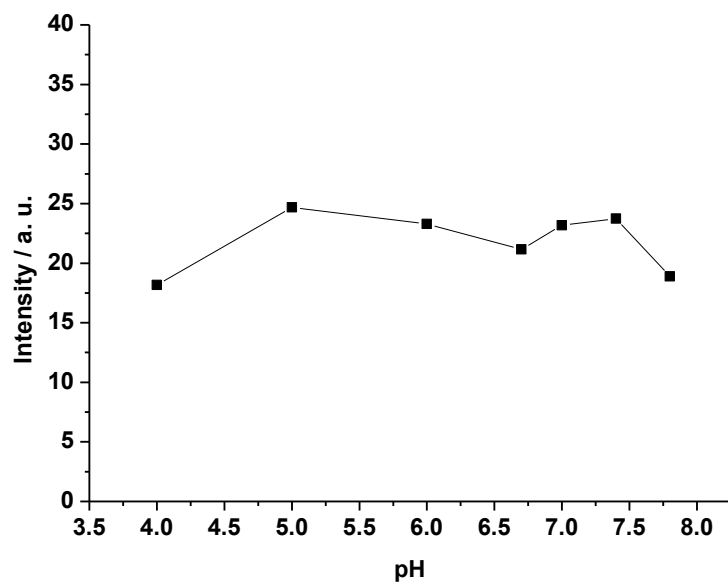

**Fig. S1.** Intensity of **MT-PVIM** (2  $\mu\text{M}$ ) in acetonitrile-Tris/HCl buffer solution at different pH value. Excitation wavelength: 488 nm.

4.

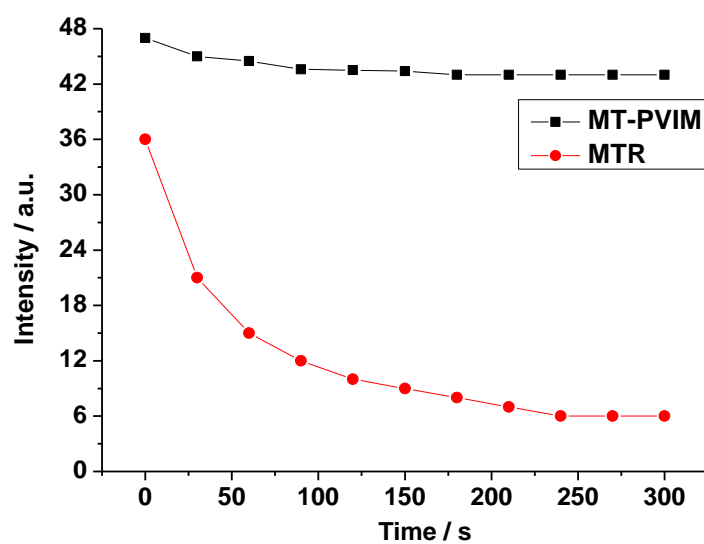

**Fig. S2.** Relative intensities of **TP-PMVC** ( $2 \mu\text{M}$ ) and **MTR** ( $2 \mu\text{M}$ ) in SiHa cells under successive irradiation at different times. **TP-PMVC**:  $\lambda_{\text{ex}} = 488 \text{ nm}$ ,  $\lambda_{\text{em}} = 499\text{--}560 \text{ nm}$ ; **MTR**:  $\lambda_{\text{ex}} = 561 \text{ nm}$ ,  $\lambda_{\text{em}} = 570\text{--}630 \text{ nm}$

5.

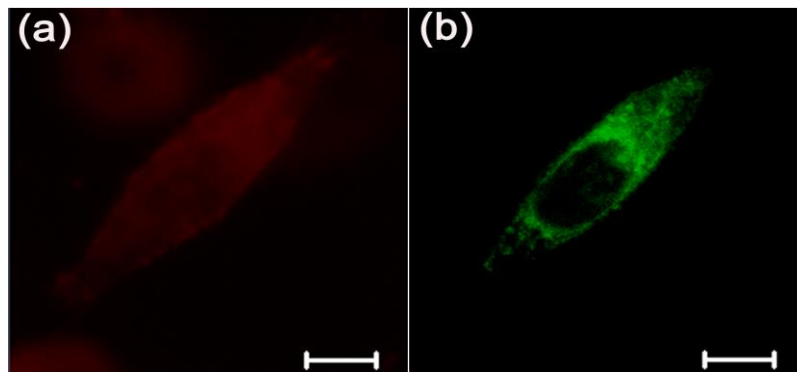

**Fig. S3.** Fluorescent images of CCCP (10  $\mu$ M) treated SiHa cells stained with (a) MTR (250 nM) for 20 min and (b) **MT-PVIM** (3  $\mu$ M) for 3 min. Excitation wavelength: 561 nm (for MTR) and 488 nm (for **MT-PVIM**).



**6. Video S1:** The process that the probe **MT-PVIM** quick enters cell and illuminates cell membrane and mitochondria.

**7. Video S2:** Fusion and fission of mitochondria. Irradiation time: 30.98 s/scan. Scale bar = 10  $\mu\text{m}$ .

**8. Video S3:** Fluorescent images of living SiHa cells stained with **MT-PVIM** (3  $\mu\text{M}$ ) as increasing scan time. Excitation wavelength: 488 nm; emission filter: 499–560 nm; irradiation time: 30.98 s/scan.

**9. Video S4:** Fluorescent images of CCCP (20  $\mu\text{M}$ ) treated living SiHa cells stained with **MT-PVIM** (3  $\mu\text{M}$ ) as increasing scan time. Excitation wavelength: 488 nm; emission filter: 499–560 nm; irradiation time: 30.98 s/scan.

## 10. Characterization

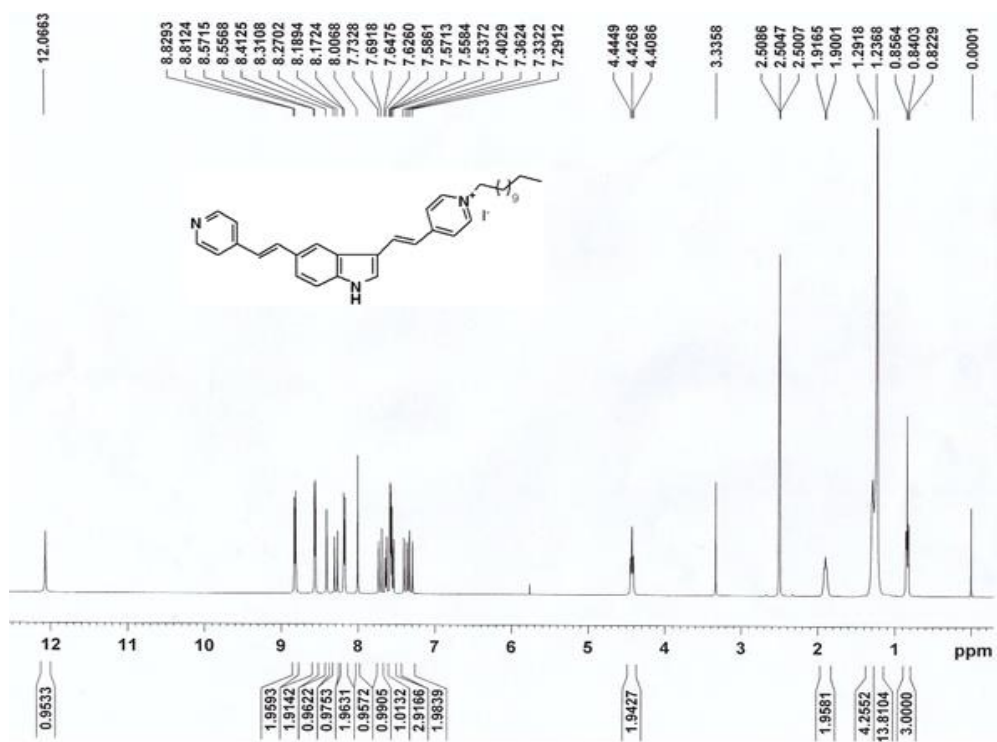

Fig. S4.  $^1\text{H}$  NMR spectrum of MT-PVIM in  $\text{DMSO-}d_6$

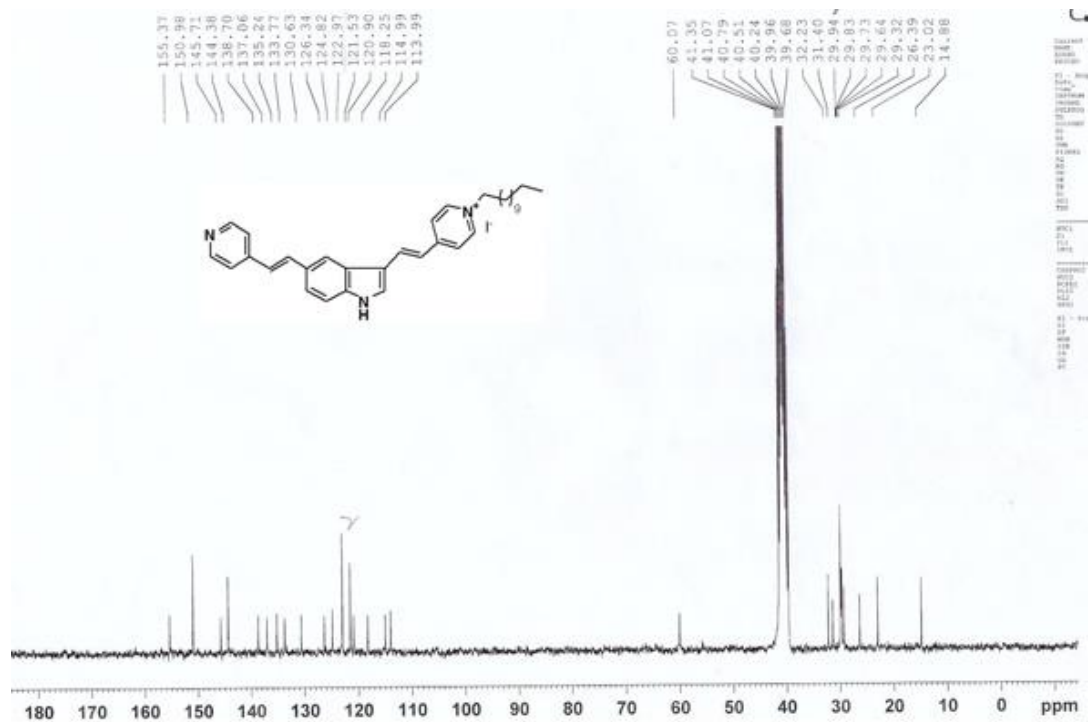

**Fig. S5.** <sup>13</sup>C NMR spectrum of MT-PVIM in DMSO-d<sub>6</sub>

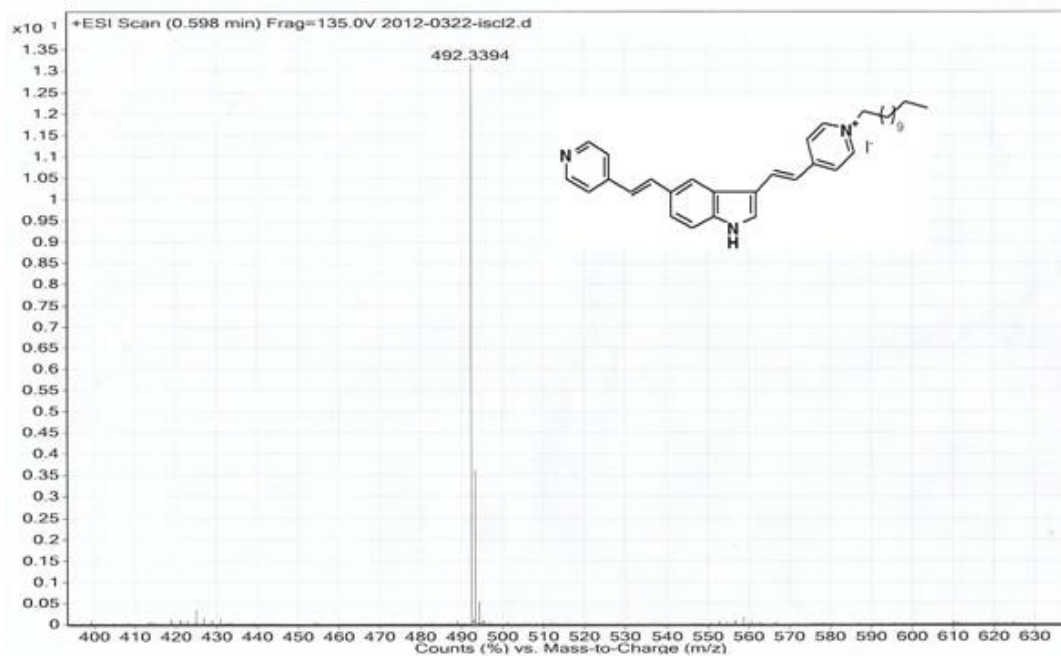

**Fig. S6. HRMS of MT-PVIM**

## Notes and references

1. A. R. Sarkar, C. H. Heo, H. W. Lee, K. Hee Park, Y. H. Suh and H. M. Kim, *Anal. Chem.*, 2014, **86**, 5638–5641.
2. S. Huang, R. Han, Q. Zhuang, L. Du, H. Jia, Y. Liu and Y. Liu, *Biosens. Bioelectron.*, 2015, **71**, 313–321
3. C. W. T. Leung, Y. Hong, S. Chen, E. Zhao, J. W. Y. Lam and B. Z. Tang, *J. Am. Chem. Soc.*, 2013, **135**, 62–65.
4. R. Rizzuto, A. W. Simpson, M. Brini and T. Pozzan, *Nature.*, 1992, **358**, 325-327.
5. L. V. Johnson, M. Walsh and L. B. Chen, *PNAS*, 1980, **77**, 990-994
6. R. Rizzuto, P. Pinton, W. Carrington, F. S. Fay, K. E. Fogarty, L. M. Lifshitz, R. A. Tuft and T. Pozzan, *Science.*, 1998, **280**, 1763–1766.
7. M. Karbowski and R. J. Youle, *Cell. Death. Differ.*, 2003, **10**, 870-880.
